# Supplementary material for: Staphylococcal species composition in the skin microbiota of domestic pigeons (Columba livia domestica)
Source: PubMed Central journal article supplement (PMC10337865; doi:10.1371/journal.pone.0287261), 2023-07-12
Supplement: pone.0287261.s001.pdf [file pone.0287261.s001.pdf]

**S1 Table.****Prevalence (%) of staphylococci isolated from pigeons from different lofts.**

| Loft | Number of pigeons | Species (number of strains )                                                                                                                         |
|------|-------------------|------------------------------------------------------------------------------------------------------------------------------------------------------|
| 1    | 8 (19.5%)         | <i>S. luteus</i> (4)<br><i>S. xylosus</i> (1)<br><i>S. equorum</i> (1)<br><i>S. hyicus</i> (1)<br><i>S. lugdunensis</i> (1)                          |
| 2    | 8 (19.5%)         | <i>S. luteus</i> (4)<br><i>S. xylosus</i> (1)<br><i>S. equorum</i> (1)<br><i>S. intermedius</i> (1)<br><i>S. sciuri</i> (1)                          |
| 3    | 8 (19.5%)         | <i>S. luteus</i> (3)<br><i>S. xylosus</i> (2)<br><i>S. sciuri</i> (1)<br><i>S. vitulinus</i> (2)                                                     |
| 4    | 8 (19.5%)         | <i>S. luteus</i> (3)<br><i>S. xylosus</i> (1)<br><i>S. equorum</i> (1)<br><i>S. hyicus</i> (1)<br><i>S. hominis</i> (1)<br><i>S. auricularis</i> (1) |
| 5    | 9 (22%)           | <i>S. luteus</i> (5)<br><i>S. xylosus</i> (1 )<br><i>S. equorum</i> (1)<br><i>S. hyicus</i> (1)<br><i>S. intermedius</i> (1)                         |
